# Supplementary material
Source: PubMed Central journal article supplement (PMC4568501)
Supplement: supp_tpc.15.00228_TPC2015-00228-LSBR2_Supplemental_Data.pdf [file supp_tpc.15.00228_TPC2015-00228-LSBR2_Supplemental_Data.pdf]

A

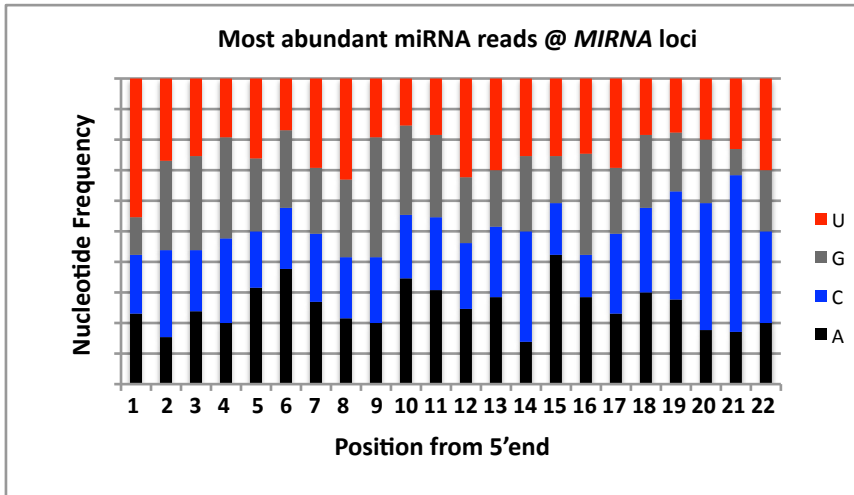

B

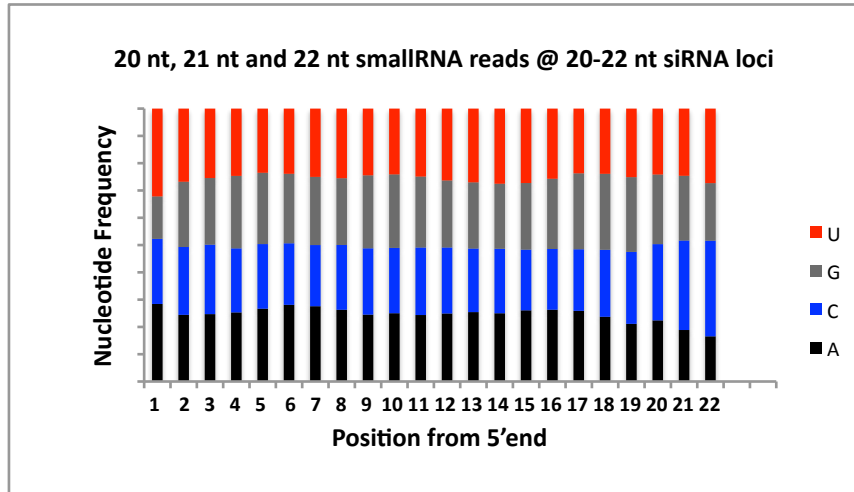

C

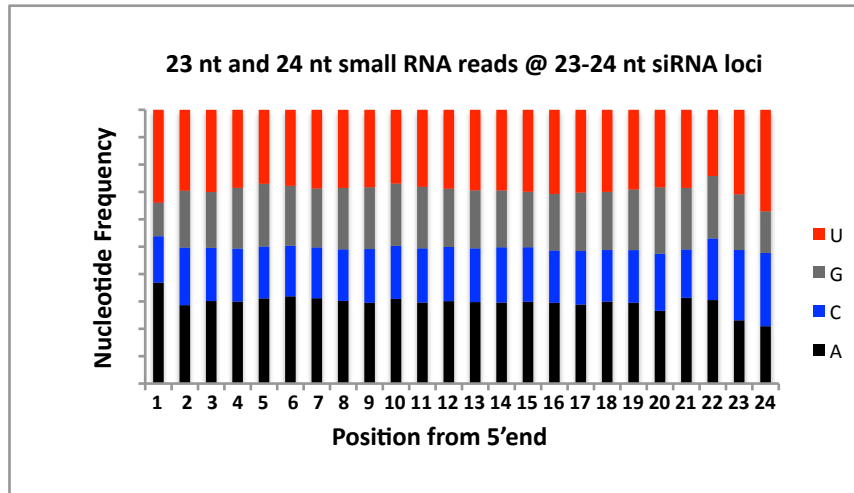

**Supplemental Figure 1.** Nucleotide frequency of *Physcomitrella patens* small RNAs for each position. Only distinct small RNA sequences were considered in this analysis. Frequency of each nucleotide for each position in (A) most abundant miRNA reads at *MIRNA* loci (B) small RNA reads mapped to 20-22 nt siRNA loci and (C) 23-24 nt siRNA loci.

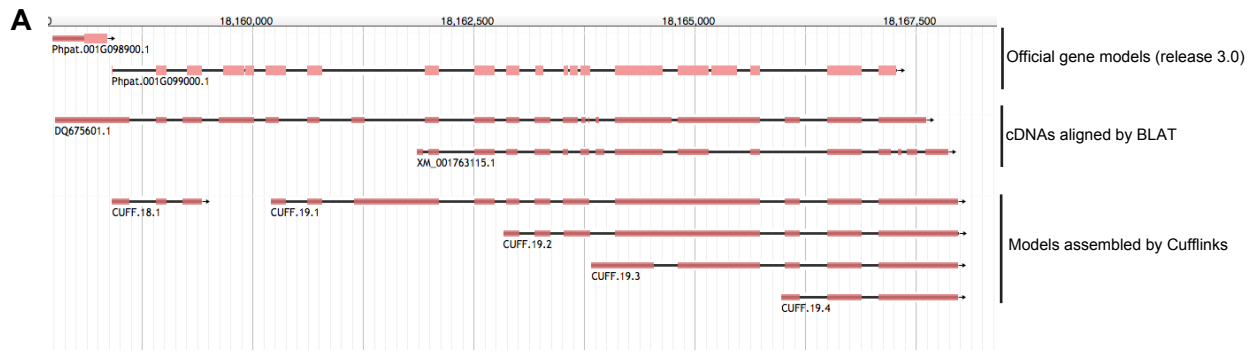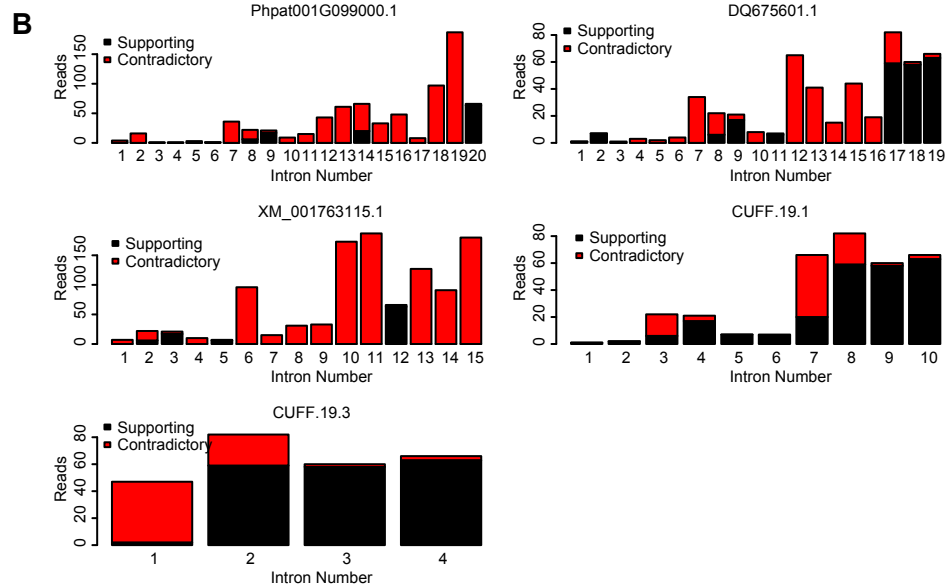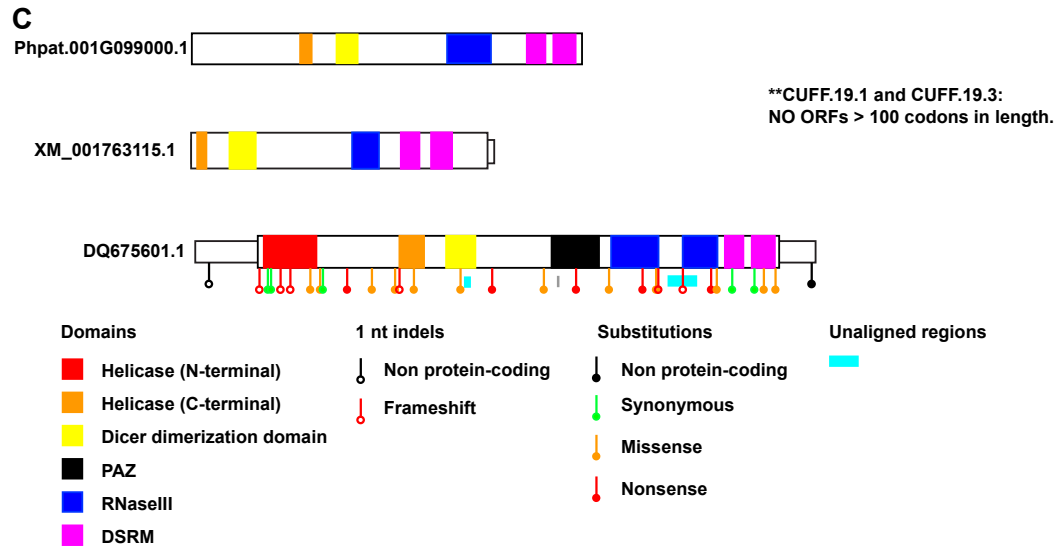

**Supplemental Figure 2.** Discrepancies in Pp *DCL1b* annotations.

**(A)** Genome-browser snapshot of the *DCL1b* locus, showing various mRNA models. The region is roughly Chr01:18157500..18167930 **(B)** Barplots showing tallies of supporting and contradictory RNA-seq reads for each intron of the indicated gene models. RNA-seq data were from a merger of SRR435295 and SRR435296 (Chen et al., 2012), aligned to the reference genome using tophat (version 2.0.9) with non-default setting -l 5000 (using bowtie2 version 2.1.0 as the underlying alignment engine). Contradictory reads were those which had at least one base aligned to the intron, while confirmatory reads were those which spanned the annotated splice sites exactly. The RNA-seq alignments are downloadable from [http://plantsmallrnagenes.psu.edu/Physcomitrella\\_patens/data/RNA-seq/Chen\\_et\\_al\\_WT.bam](http://plantsmallrnagenes.psu.edu/Physcomitrella_patens/data/RNA-seq/Chen_et_al_WT.bam) Note that the majority of introns for the first three models are unsupported by the empirical data. **(C)** Schematics, to scale, of inferred protein sequences from the indicated mRNA models. Protein domains were based on searches of the PFAM database (version 27; <http://pfam.xfam.org/>) under default parameters. mRNA model DQ675601.1 had multiple mismatches to the reference genome. The consequences of those edits are shown. Note that none of the gene models can make a full-length functional DCL protein. Phpat001G09900.1 and XM\_001763115.1 lack the N-terminal Helicase domain, the PAZ domain, and one of the RNase III domains, while DQ675601.1 contains multiple frameshifts and premature stop codons. None of the the Cufflinks-assembled mRNAs have any ORFs longer than 100 codons.

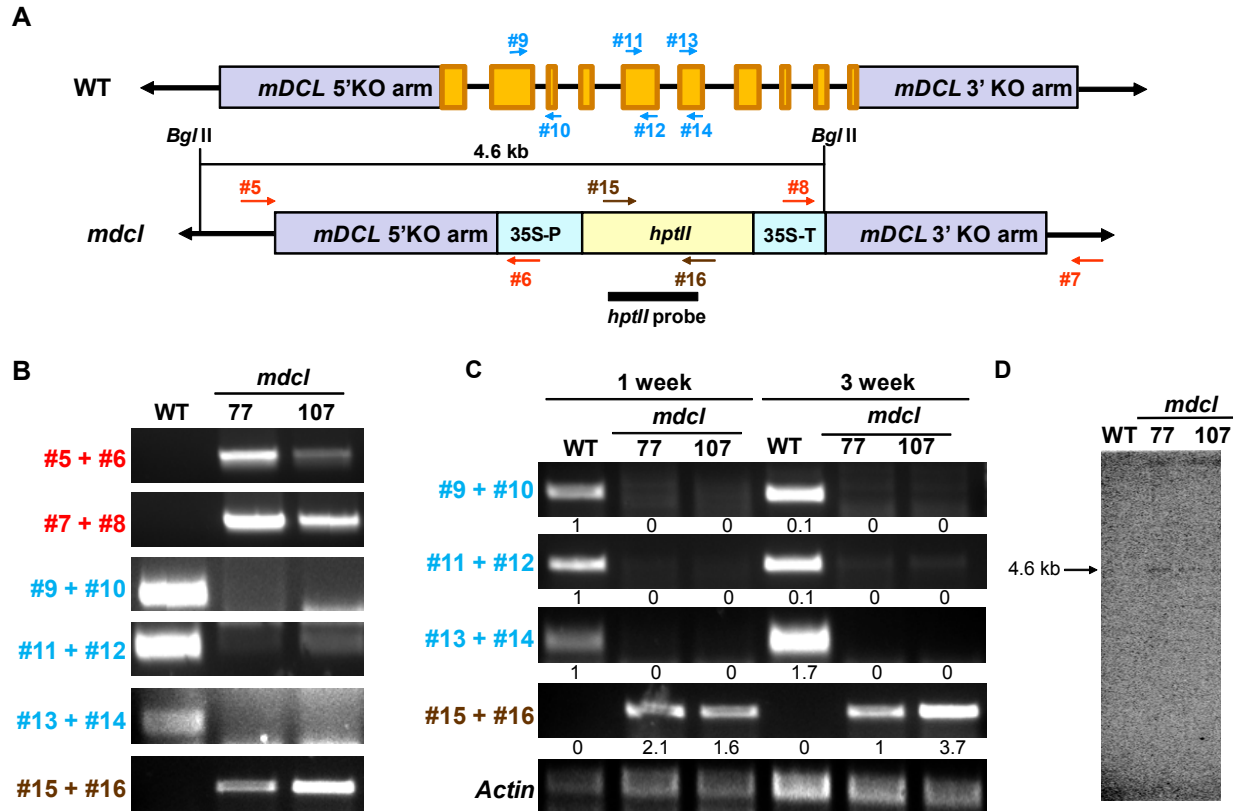

**Supplemental Figure 3. Targeted knock-out of *mDCL*.**

**(A)** Schematic of *mDCL* knock-out by homologous recombination. 77 and 107 correspond to different alleles of the *mdcl* mutant. The numbered arrows indicate approximate locations of primers (Supplemental Table 3). 35S-P, CaMV 35S promoter; 35S-T, CaMV 35S terminator. **(B)** Genotyping of transformed plants by genomic DNA PCRs using the indicated primer sets. **(C)** Transcript analysis by RT-PCR using indicated primer sets. *Actin* served as a control. Numbers below PCR fragments indicate relative (to *Actin*) intensities of bands compared to 1-week old WT, except for primer set 15-16, which was normalized to the value of 3-week *mdcl* line 77. **(D)** DNA blot analysis of *mdcl* mutant plants. BglIII digested genomic DNA was blotted and hybridized with an *hptII* probe.

A

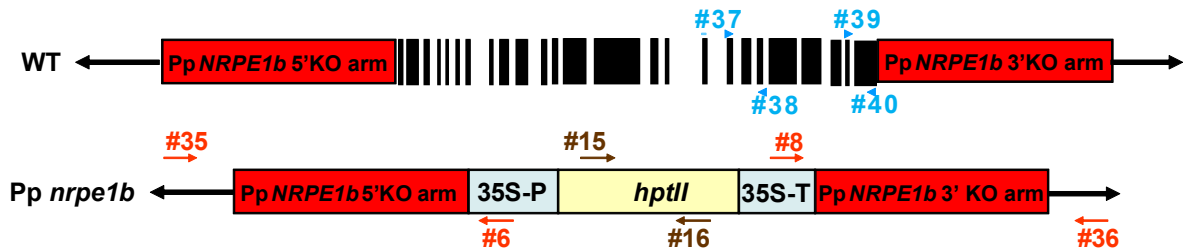

B

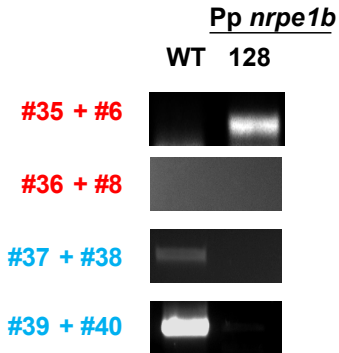

C

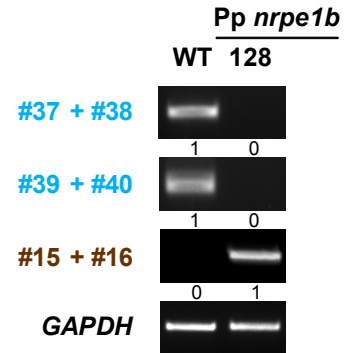

**Supplemental Figure 4. Targeted knock-out of Pp NRPE1b**

(A) Schematic of Pp NRPE1b knock out by homologous recombination. The numbered arrows indicate approximate locations of primers (Supplemental Table 3). 35S-P, CaMV 35S promoter; 35S-T, CaMV 35S terminator. (B) Genotyping of transformed plants by genomic DNA PCRs using the indicated primer sets. '128' refers to the isolated mutant line. (C) Transcript analysis by RT-PCR using indicated primer sets. GAPDH served as a control. Numbers below PCR fragments indicate relative intensity (normalized to GAPDH) compared to that of WT (primer sets 37-38 and 39-40) or mutant (primer set 15-16).

A

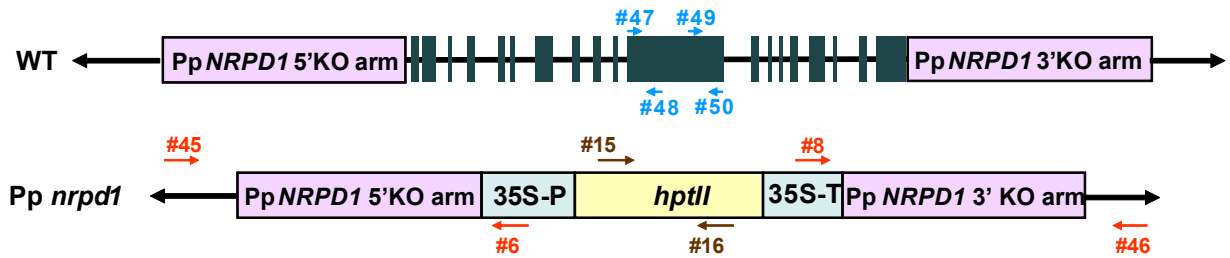

B

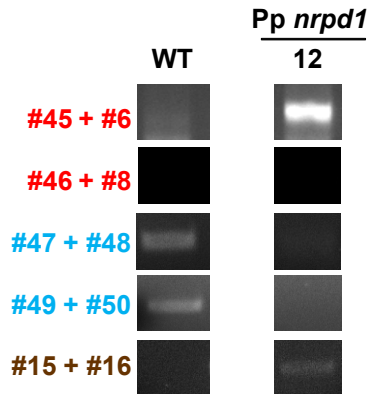

C

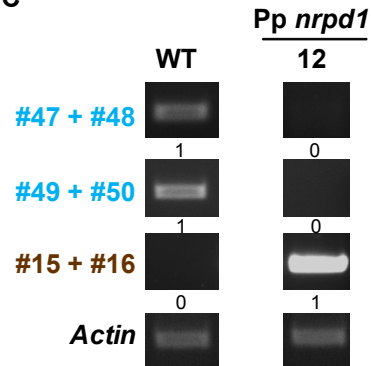

**Supplemental Figure 5.** Targeted knock-out of *Pp NRPD1*.

(A) Schematic of *Pp NRPD1* knock out by homologous recombination. The numbered arrows indicate approximate locations of primers (Supplemental Table 3). 35S-P, CaMV 35S promoter; 35S-T, CaMV 35S terminator. (B) Genotyping of transformed plants by genomic DNA PCRs using the indicated primer sets. Both 5' and 3' recombination in line 12 was confirmed. (C) Transcript analysis by RT-PCR using indicated primer sets. *Actin* served as a control. Numbers below PCR fragments indicate relative intensity (normalized to *Actin*) compared to that of WT (primer sets 47-48 and 49-50) or mutant (primer set 15-16).

A

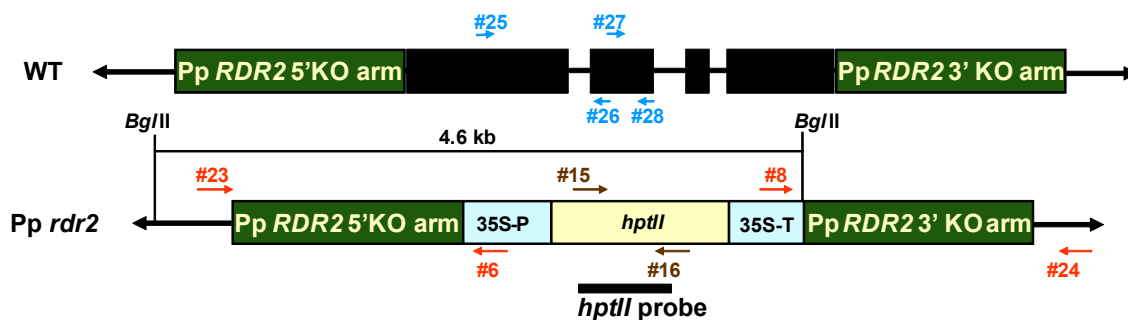

B

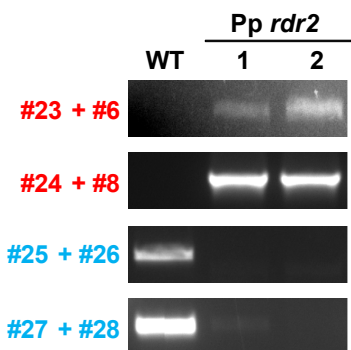

C

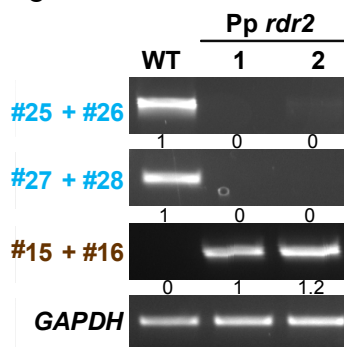

D

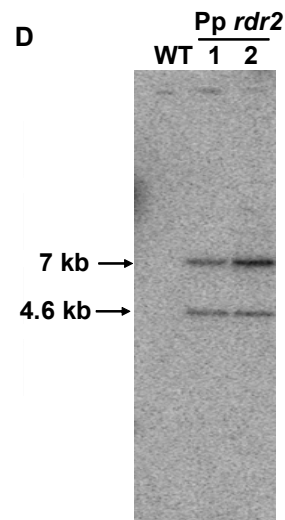

**Supplemental Figure 6.** Targeted knock-out of Pp *RDR2*.

(A) Schematic of Pp *RDR2* knock out by homologous recombination. The numbered arrows indicate approximate locations of primers (Supplemental Table 3). 35S-P, CaMV 35S promoter; 35S-T, CaMV 35S terminator. (B) Genotyping of transformed plants by genomic DNA PCRs using the indicated primer sets. '1' and '2' refer to two independent lines (C) Transcript analysis by RT-PCR using indicated primer sets. *GAPDH* served as a control. Numbers below PCR fragments indicate relative intensity (compared to *GAPDH*) compared to that of WT (primer sets 25-26 and 27-28) or mutant line 1 (primer set 15-16). (D) DNA blot analysis. BglII digested genomic DNA was blotted and hybridized with an *hptII* probe. The 7kb band corresponds to the fragment size for the tandem repeat of the targeting cassette. This result shows the vector was inserted into a single site with a tandem repeat in the genome.

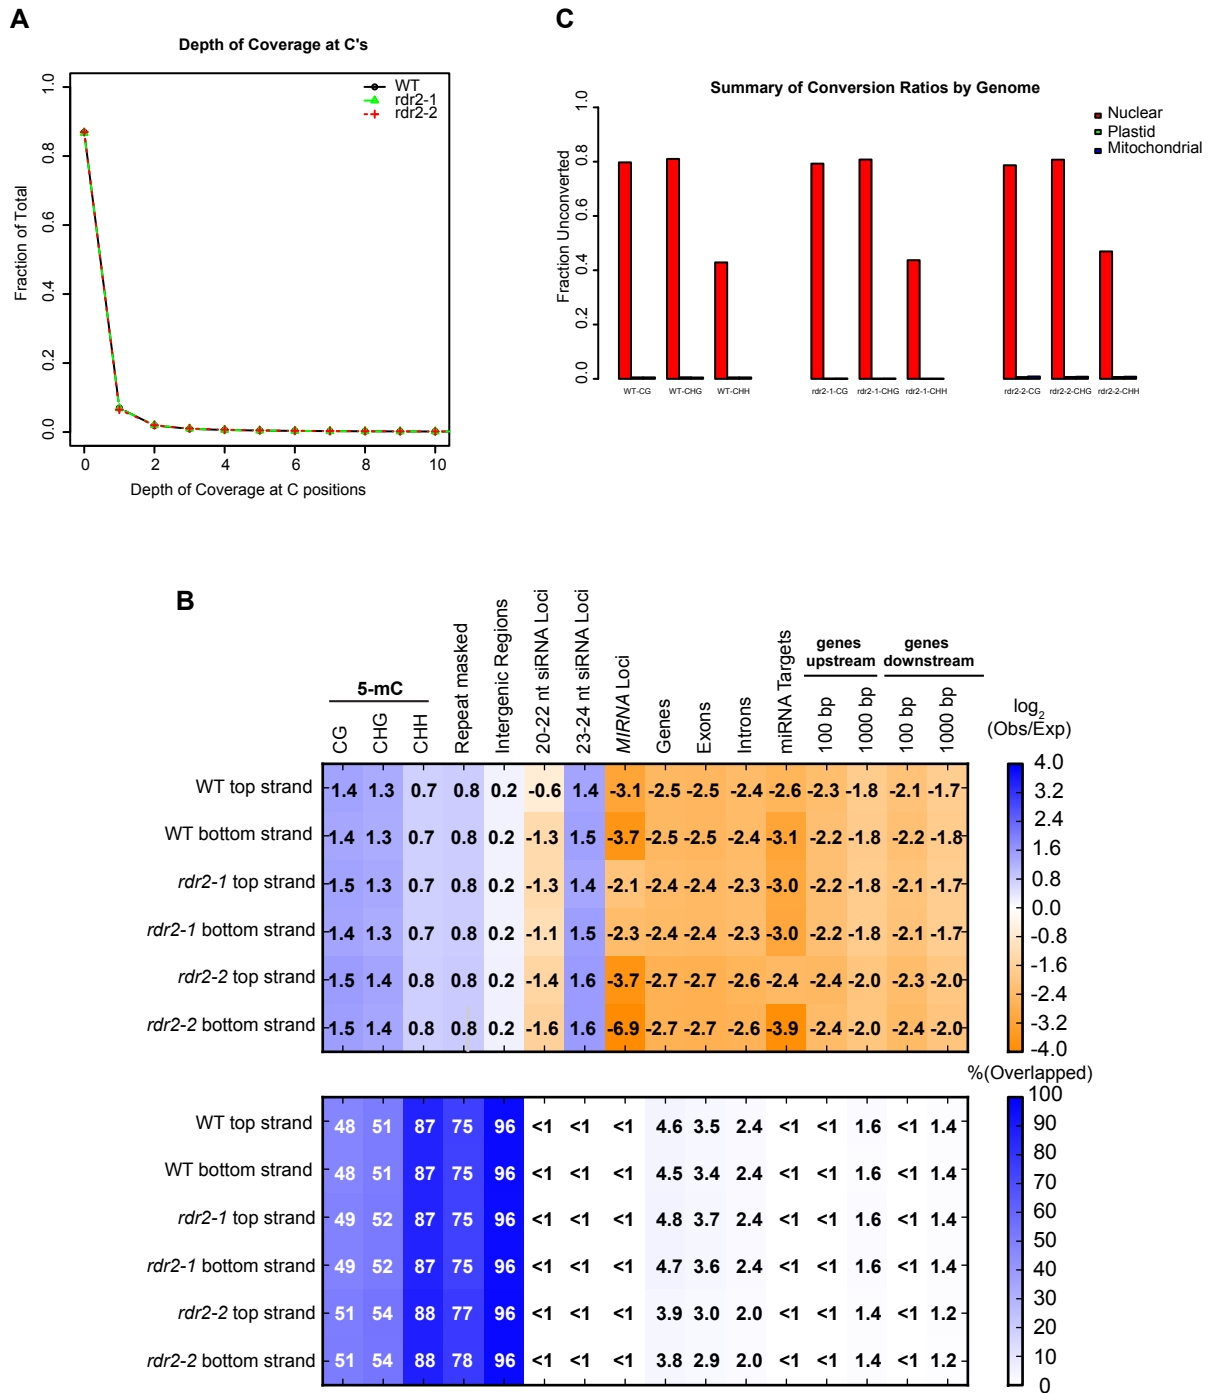

**Supplemental Figure 7.** Overview of bisulfite-seq libraries. **(A)** Overall depth of coverage at cytosines in the nuclear genome. **(B)** Heatmap showing  $\log_2$  (observed overlapped bases / expected overlapped bases) for each of the pair-wise comparisons shown (top), and percentages of covered regions that overlap indicated regions (bottom). **(C)** Summary of conversion ratios by genome and library.



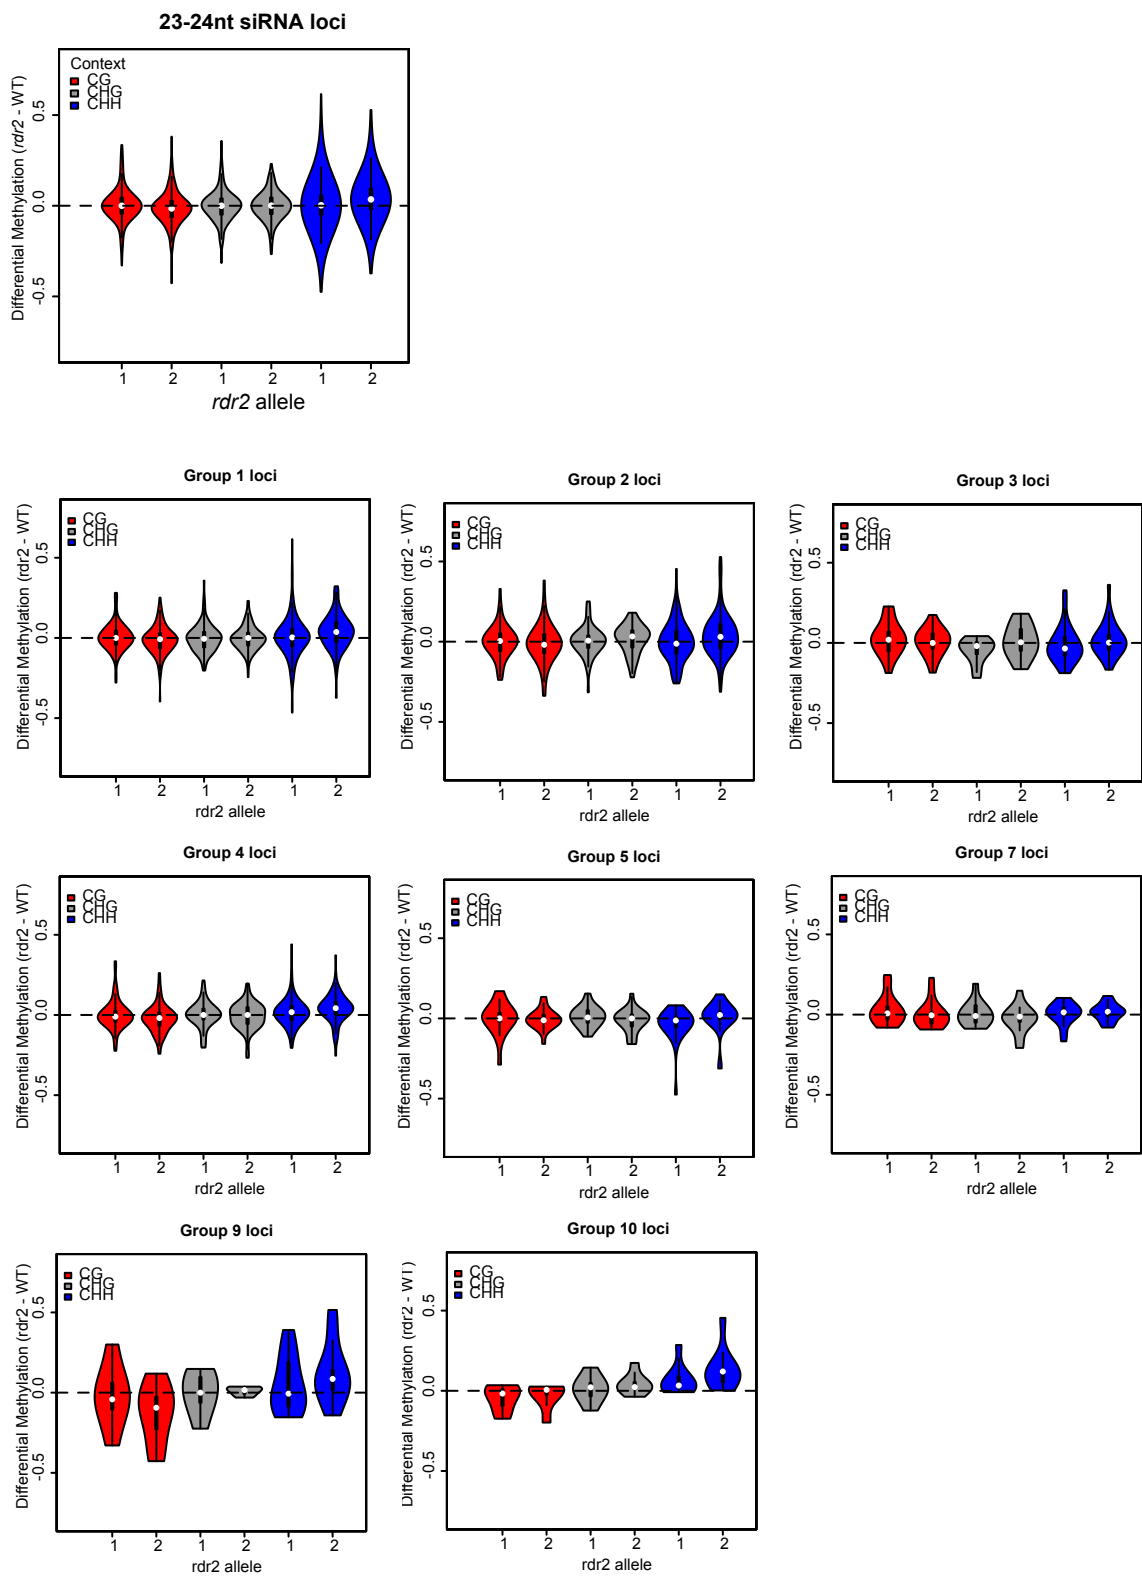

**Supplemental Figure 8.** Analysis of DNA methylation at 23-24 nt siRNA loci in *Pp rdr2* mutants. Differential DNA methylation between the indicated *Pp rdr2* alleles and the wild-type for the indicated loci. The ‘groups’ refer to groups shown in Figure 6D. Violin plots show a Tukey boxplot (line=median, box edges=1st and 3rd quartiles, whiskers=1.5 IQR) surrounded by a twinned kernel density plot to visually show the distribution of the data.

**Supplemental Table 1: *Physcomitrella patens* small RNA-seq libraries.**

| Library | Genotype   | Strain        | Number of Mapped Reads | GEO GSE  | GEO GSM    | Libraries Re-sequenced |
|---------|------------|---------------|------------------------|----------|------------|------------------------|
| 1       | Wild-type  | Gransden 2004 | 29,985,916             | GSE44900 | GSM1093595 | -                      |
| 2       | Wild-type  | Gransden 2004 |                        | GSE44900 | GSM1194292 | Re-run of Library 1    |
| 3       | Wild-type  | Gransden 2004 | 31,363,125             | GSE44900 | GSM1093596 | -                      |
| 4       | Wild-type  | Gransden 2004 |                        | GSE44900 | GSM1194293 | Re-run of Library 3    |
| 5       | Wild-type  | Gransden 2004 | 10,487,292             | GSE44900 | GSM1194296 | -                      |
| 6       | Wild-type  | Gransden 2004 | 12,655,162             | GSE44900 | GSM1194297 | -                      |
| 7       | Wild-type  | Gransden 2009 | 19,593,167             | GSE44900 | GSM1093597 | -                      |
| 8       | Wild-type  | Gransden 2009 |                        | GSE44900 | GSM1194294 | Re-run of Library 7    |
| 9       | Wild-type  | Gransden 2009 | 24,811,895             | GSE44900 | GSM1093598 | -                      |
| 10      | Wild-type  | Gransden 2009 |                        | GSE44900 | GSM1194295 | Re-run of Library 9    |
| 11      | rdr2-1     | Gransden 2004 | 22,023,647             | GSE51419 | GSM1245155 | -                      |
| 12      | rdr2-1     | Gransden 2004 |                        | GSE51419 | GSM1245157 | Re-run of Library 11   |
| 13      | rdr2-1     | Gransden 2004 | 29,305,900             | GSE51419 | GSM1245156 | -                      |
| 14      | rdr2-1     | Gransden 2004 |                        | GSE51419 | GSM1245158 | Re-run of Library 13   |
| 15      | rdr2-2     | Gransden 2004 | 16,328,990             | GSE51419 | GSM1245159 | -                      |
| 16      | rdr2-2     | Gransden 2004 | 17,532,117             | GSE51419 | GSM1245160 | -                      |
| 17      | rdr6-19    | Gransden 2004 | 12,771,158             | GSE51419 | GSM1245161 | -                      |
| 18      | rdr6-19    | Gransden 2004 | 10,799,819             | GSE51419 | GSM1245162 | -                      |
| 19      | rdr6-35    | Gransden 2004 | 12,976,974             | GSE51419 | GSM1245163 | -                      |
| 20      | rdr6-35    | Gransden 2004 | 14,889,594             | GSE51419 | GSM1245164 | -                      |
| 21      | dcl3-5     | Gransden 2004 | 11,234,135             | GSE51419 | GSM1245131 | -                      |
| 22      | dcl3-5     | Gransden 2004 | 12,369,785             | GSE51419 | GSM1245132 | -                      |
| 23      | dcl3-10    | Gransden 2004 | 22,572,662             | GSE51419 | GSM1245133 | -                      |
| 24      | dcl3-10    | Gransden 2004 | 12,409,186             | GSE51419 | GSM1245134 | -                      |
| 25      | dcl4-1     | Gransden 2004 | 8,549,049              | GSE51419 | GSM1245135 | -                      |
| 26      | dcl4-1     | Gransden 2004 | 15,871,722             | GSE51419 | GSM1245136 | -                      |
| 27      | mdcl-77    | Gransden 2009 | 25,765,988             | GSE51419 | GSM1245137 | -                      |
| 28      | mdcl-77    | Gransden 2009 |                        | GSE51419 | GSM1245141 | Re-run of Library 27   |
| 29      | mdcl-77    | Gransden 2009 | 24,688,556             | GSE51419 | GSM1245138 | -                      |
| 30      | mdcl-77    | Gransden 2009 |                        | GSE51419 | GSM1245142 | Re-run of Library 29   |
| 31      | mdcl-107   | Gransden 2009 | 39,984,388             | GSE51419 | GSM1245139 | -                      |
| 32      | mdcl-107   | Gransden 2009 |                        | GSE51419 | GSM1245143 | Re-run of Library 31   |
| 33      | mdcl-107   | Gransden 2009 | 25,387,913             | GSE51419 | GSM1245140 | -                      |
| 34      | mdcl-107   | Gransden 2009 |                        | GSE51419 | GSM1245144 | Re-run of Library 33   |
| 35      | nrpe1b_128 | Gransden 2004 | 29,803,961             | GSE51419 | GSM1245145 | -                      |
| 36      | nrpe1b_128 | Gransden 2004 |                        | GSE51419 | GSM1245149 | Re-run of Library 35   |
| 37      | nrpe1b_128 | Gransden 2004 | 26,708,434             | GSE51419 | GSM1245146 | -                      |
| 38      | nrpe1b_128 | Gransden 2004 |                        | GSE51419 | GSM1245150 | Re-run of Library 37   |
| 39      | nrpd1_12   | Gransden 2004 | 13,482,499             | GSE51419 | GSM1245153 | -                      |
| 40      | nrpd1_12   | Gransden 2004 | 15,407,223             | GSE51419 | GSM1245154 | -                      |

Supplemental Data. Coruh et al. Plant Cell (2015) 10.1105/tpc.15.00228  
Supplemental Table 2: Summary of whole-genome bisulfite-seq libraries

| <b>Sample</b> | <b>SRA Accession</b> | <b>Total Pairs</b> | <b>Pairs Passed<br/>Quality Control</b> | <b>Concordantly<br/>Aligned Pairs</b> | <b>Pairs flagged as<br/>PCR Duplicates</b> | <b>Accepted Pairs</b> |
|---------------|----------------------|--------------------|-----------------------------------------|---------------------------------------|--------------------------------------------|-----------------------|
| Wild-type     | <i>SRR2013850</i>    | 222,081,099        | 211,783,332                             | 156,513,930                           | 153,613,143                                | 2,900,787             |
| rdr2-1        | <i>SRR2013877</i>    | 235,045,740        | 224,132,719                             | 202,792,076                           | 199,510,574                                | 3,281,502             |
| rdr2-2        | <i>SRR2013879</i>    | 259,564,115        | 245,949,602                             | 199,155,549                           | 195,904,139                                | 3,251,410             |

| Supplemental Data. Coruh et al. Plant Cell (2015) 10.1105/tpc.15.00228 |                                                                                    |                                           |
|------------------------------------------------------------------------|------------------------------------------------------------------------------------|-------------------------------------------|
| Supplemental Table 3. Oligonucleotide sequences used in this study.    |                                                                                    |                                           |
| Number                                                                 | Use                                                                                | Sequence (5'→3')                          |
| 1                                                                      | mDCL KO vector construction, 5'KO arm (Forward)                                    | CGCCTAGGATTTAAATAGATGTGTATTAATTACACCAACAC |
| 2                                                                      | mDCL KO vector construction, 5'KO arm (Reverse)                                    | CGAAGCTTAATGATGATACAGGGGTGACAACGG         |
| 3                                                                      | mDCL KO vector construction, 3'KO arm (Forward)                                    | CGAGATCTCTTTATAGAAGGCATCTAGGAAGTC         |
| 4                                                                      | mDCL KO vector construction, 3'KO arm (Reverse)                                    | CGACGCGTATTTAAATTACAATAGATTAATTTTCATACAAA |
| 5                                                                      | mDCL KO identification of checking for 5' recombination (Forward)                  | ACCTCCAACGAGATGAGAACTACGC                 |
| 6                                                                      | KO identification checking for 5' recombination, 35S Promoter Internal (Reverse)   | AGATAGCTGGGCAATGGAATCCGA                  |
| 7                                                                      | mDCL KO identification of checking for 3' recombination (Reverse)                  | AATATCCGCGCAGGTTAAGTTCTTAGC               |
| 8                                                                      | KO identification checking for 3' recombination, 35S Terminator Internal (Forward) | GGGTTTCGCTCATGTGTTGAGCAT                  |
| 9                                                                      | mDCL KO genotyping (Internal Forward1)                                             | GAAGCACTCGATGGTGGTGG                      |
| 10                                                                     | mDCL KO genotyping (Internal Reverse1)                                             | ACTGCAGATGTTGCGCGTACGTAG                  |
| 11                                                                     | mDCL KO genotyping (Internal Forward2)                                             | GGGCAAGTCATTGGACTCAAAC                    |
| 12                                                                     | mDCL KO genotyping (Internal Reverse2)                                             | CTTCCTCTTGGTACACCGCTC                     |
| 13                                                                     | mDCL KO genotyping (Internal Forward3)                                             | GCATGTGAAGGGAACCACTCATAC                  |
| 14                                                                     | mDCL KO genotyping (Internal Reverse3)                                             | CGTCTTGGTATTTAGCAGTTCAGC                  |
| 15                                                                     | Identification of hptII gene in mutants (Forward)                                  | TGTTTATCGGCACCTTGCATCGGC                  |
| 16                                                                     | Identification of hptII gene in mutants (Reverse)                                  | AGCTGCATCATCGAAATTGCCGTC                  |
| 17                                                                     | Actin (Forward)                                                                    | ATCTGGAATGGTCAAGGCCGGTTT                  |
| 18                                                                     | Actin (Reverse)                                                                    | TCATCTTCTCCCTGTTTCGCCTTCG                 |
| 19                                                                     | RDR2 KO vector construction, 5'KO arm (Forward)                                    | CAAGCTTGGGACAAGGGAAGGTTCTCAAA             |
| 20                                                                     | RDR2 KO vector construction, 5'KO arm (Reverse)                                    | AACTCGAGACACCCACCACATTCTCAGTCAT           |
| 21                                                                     | RDR2 KO vector construction, 3'KO arm (Forward)                                    | CCAGATCTACTGCTACACAGCGAGGATTTCTG          |
| 22                                                                     | RDR2 KO vector construction, 3'KO arm (Reverse)                                    | CCACGCGTTCAAGCAATGGGATAGGAGGCCAA          |
| 23                                                                     | RDR2 KO identification of checking for 5' recombination (Forward)                  | GAGAGATGCAGTTTCGCAGCAGTA                  |
| 24                                                                     | RDR2 KO identification of checking for 3' recombination (Reverse)                  | TGGCTATATGTATGGTAATAAGGGACC               |
| 25                                                                     | RDR2 KO genotyping (Internal Forward1)                                             | ACAATGATCAGGGCATGGATGGGA                  |
| 26                                                                     | RDR2 KO genotyping (Internal Reverse1)                                             | ACCCGCTGCGAGCATATCTATCAA                  |
| 27                                                                     | RDR2 KO genotyping (Internal Forward2)                                             | TGATAGATATGCTCGCAGCGGGTT                  |
| 28                                                                     | RDR2 KO genotyping (Internal Reverse2)                                             | AAACCAAGCAGTCAACCATGTGCC                  |
| 29                                                                     | GAPDH F                                                                            | CCTCTTGCAAAGGTGATCAACGAC                  |
| 30                                                                     | GAPDH R                                                                            | ACCACACGGTTGCTGTAACCCAC                   |
| 31                                                                     | NRPE1a KO vector construction, 5'KO arm (Forward)                                  | GGAAGCTTCCGGAAGAATTTGGCTAATCCGCA          |
| 32                                                                     | NRPE1a KO vector construction, 5'KO arm (Reverse)                                  | GGCTCGAGCGAGCGATAAGCATTAAAGCAACG          |
| 33                                                                     | NRPE1a KO vector construction, 3'KO arm (Forward)                                  | GGAGATCTTGCCTGAAACCTATTTGAGATGGA          |
| 34                                                                     | NRPE1a KO vector construction, 3'KO arm (Reverse)                                  | GGACGCGTGCCACAAGTCCAAGACATTAGAACT         |
| 35                                                                     | NRPE1a KO identification of checking for 5' recombination (Forward)                | TCTGTTGTTGCTGATGCAGGTCAG                  |
| 36                                                                     | NRPE1a KO identification of checking for 3' recombination (Reverse)                | GTGTCTTCAAGCTAGACATATTTAGAAATGG           |
| 37                                                                     | NRPE1a KO genotyping (Internal Forward1)                                           | GGGACAAATTTCTTTTGTGTCAGTTA                |
| 38                                                                     | NRPE1a KO genotyping (Internal Reverse1)                                           | AATACCAAACCAAGTCTCTGTGAG                  |
| 39                                                                     | NRPE1a KO genotyping (Internal Forward2)                                           | AACTTGGTGGCAGGCTTTCTGACG                  |
| 40                                                                     | NRPE1a KO genotyping (Internal Reverse2)                                           | TCAAGATCCTCATGATCAATAGGC                  |
| 41                                                                     | NRPD1 KO vector construction, 5'KO arm (Forward)                                   | GGCCTAGGTGTCATTTAGGATAGTGCGGG             |
| 42                                                                     | NRPD1 KO vector construction, 5'KO arm (Reverse)                                   | GGCTCGAGCCTTCAAGCACAAAACAAAG              |

|    |                                                                    |                                                               |  |  |
|----|--------------------------------------------------------------------|---------------------------------------------------------------|--|--|
| 43 | NRPD1 KO vector construction, 3'KO arm (Forward)                   | GGAGATCTGATTGGTTACCTTCGCAATGCCAT                              |  |  |
| 44 | NRPD1 KO vector construction, 3'KO arm (Reverse)                   | GGACGCGTGCAATTTGATGGCTCCTTGT                                  |  |  |
| 45 | NRPD1 KO identification of checking for 5' recombination (Forward) | TGTGAAGGCAGTTAATGGTGA                                         |  |  |
| 46 | NRPD1 KO identification of checking for 3' recombination (Reverse) | GGAGATGGATACTATGATTGATGG                                      |  |  |
| 47 | NRPD1 KO genotyping (Internal Forward1)                            | AGATACATGAAGGGGCATATTTTAGC                                    |  |  |
| 48 | NRPD1 KO genotyping (Internal Reverse1)                            | GTCGTTCAATATTAAGCCGTGAC                                       |  |  |
| 49 | NRPD1 KO genotyping (Internal Forward2)                            | TTGGATAAGGTTGCTGTCCGATAGG                                     |  |  |
| 50 | NRPD1 KO genotyping (Internal Reverse2)                            | ACCATACCGTGATGATAAAGTGTG                                      |  |  |
| 51 | Small RNA gel blot of ppt-miR156 (probe)                           | GTGCTCACTCTCTTCTGTCA                                          |  |  |
| 52 | Small RNA gel blot U6 (probe)                                      | TTGTGCGTGTATCCTTGGCGCA                                        |  |  |
| 53 | Small RNA gel blot SBP3 up target region F (probe)                 | GTATCCCTGCCCTTCAACTTCAGGTTGGTTTTATGTTTGTGCGAAACAGCT           |  |  |
| 54 | Small RNA gel blot SBP3 up target region R (probe)                 | AGCTGTTTTGACAAACATAAAACCAACCTGAAGTTGAAGGGCAGGGATAC            |  |  |
| 55 | Small RNA gel blot SBP3 down target region F (probe)               | TGAGTCTGTGGGGCTGAATTGTGGGCTAGCTGCGACTGGTTACGGGGCTC            |  |  |
| 56 | Small RNA gel blot SBP3 down target region R (probe)               | GAGCCCCGTAACCAGTCGCAGCTAGCCACAATTCAGCCCCACAGACTCA             |  |  |
| 57 | Small RNA gel blot HD-ZIPIII up target site F (probe)              | CAACGCAAGGAAGCAACAAGGCTGGTCAGTGTTAATGCAAAGCTGACAGC            |  |  |
| 58 | Small RNA gel blot HD-ZIPIII up target site R (probe)              | GCTGTCACTTTGCATTAACACTGACCAGCCTTGTGCTTCCCTTGCCTTG             |  |  |
| 59 | Small RNA gel blot HD-ZIPIII down target site F (probe)            | GATTACTGTACTTTGAGATACACTACAATTTGGAGGATGAAACCTGGT              |  |  |
| 60 | Small RNA gel blot HD-ZIPIII down target site R (probe)            | ACCAGGTTTCCATCCTCCAAAATTGTAGTGTATCTCAAAGTACAGTAATC            |  |  |
| 61 | Sequencing primer A*                                               | ACACTCTTCCCTACACGACGCTCTTCCGATCT                              |  |  |
| 62 | Sequencing primer B*                                               | CGGTCTCGGCATTCTTGCTGAACCGCTCTTCCGATCT                         |  |  |
| 63 | Illumina PE PCR primer A                                           | AATGATACGGCGACCACCGAGATCTACACTCTTCCCTACACGACGCTCTTCCGATCT     |  |  |
| 64 | Illumina PE PCR primer B                                           | CAAGCAGAAGACGGCATAACGAGATCGGTCTCGGCATTCTGCTGAACCGCTCTTCCGATCT |  |  |
| 65 | RT3 Forward                                                        | AACCATGGTCTTCTRTTTCTATGGAYTTCATCA                             |  |  |
| 66 | RT3 Reverse                                                        | CCAAAATCTTGATACAAATTGAGT                                      |  |  |
| 67 | RT6 Forward                                                        | TATGATTGCGCCATAGAMTTRSARGAAGGA                                |  |  |
| 68 | RT6 Reverse                                                        | AAAATATCATCYARRTAGATGACAACAAA                                 |  |  |
| 69 | Pp EF1-alpha Forward                                               | CGACGCCCTGGACATC                                              |  |  |
| 70 | Pp EF1-alpha Reverse                                               | CCTGCGAGGTTCCCGTAA                                            |  |  |
|    |                                                                    |                                                               |  |  |
| *  | C's were synthesized as 5-methyl Cytosine                          |                                                               |  |  |
